# Supplementary material
Source: PubMed Central journal article supplement (PMC7160259)

## Supplemental Methods

### Cell lines

Daudi (RRID:CVCL\_0008) and derivatives transfected to express MICA or  $\beta_2m^1$  were maintained in culture media (RPMI-1640 (Sigma Aldrich), 10% fetal calf serum, 2 mM L-glutamine, 50 U/ml penicillin streptomycin (Gibco)) at 37°C, 5% CO<sub>2</sub>.

### Functional Assays: CD107a degranulation and IFN- $\gamma$ ELISA

For degranulation assays, unstimulated or IL-2 stimulated NK cells were co-incubated with target cells (Daudi, Daudi-MICA, Daudi- $\beta_2m$ , or Daudi pre-coated with 10 $\mu$ g/ml rituximab for 30 min at 37°C), at 1:1 ratio in the presence of monensin (GolgiStop, 1/1,000 dilution: BD Biosciences) and PE-labelled anti-Lamp-1 mAb (RRID:AB\_396135) or isotype matched control mAb (PE-labelled IgG1 RRID:AB\_326435) for 5 hours at 37°C and 5% CO<sub>2</sub>. After incubation, cells were washed and stained with viability dye (Zombie UV; Biolegend), FITC-labelled anti-CD3 mAb (RID:AB\_314060), APC-labelled anti-CD19 mAb (RRID:AB\_314242), BV711-labelled anti-CD56 mAb (RRID:AB\_2562417) and PE-labelled anti-LAMP-1 mAb or isotype matched control mAbs (FITC-labelled IgG1k (RRID:AB\_326429), and APC-labelled IgG1k (RRID:AB\_326443)). Finally, cells were washed in 1% FBS/PBS, fixed in 2% PFA/PBS for 10 min then assessed by flow cytometry (BD LSR Fortessa flow cytometer), and analysed (FlowJo V10 software).

For IFN- $\gamma$  ELISA assay, flat-bottomed 96-well plates were coated with 0.01% poly-L-lysine (Sigma Aldrich) according to the manufacturer's instructions. Wells were then coated with the following proteins in PBS: anti-CD16 mAb (5 $\mu$ g/ml; RRID:AB\_395804:), MICA-Fc (3 $\mu$ g/ml; 1300-MA-050, R&D Systems), anti-NKp30 mAb (1 $\mu$ g/ml; RRID:AB\_2149445) or isotype matched controls (Biolegend), all with ICAM-1 (2.5 $\mu$ g/ml; ADP4-050, R&D Systems); or ICAM-1 alone. These quantities had been shown to induce robust activation of NK cells. After overnight incubation at 4°C, plates were washed

in PBS and then blocked in culture media for 5 min. This was removed and 50,000 NK cells in culture media were added per well, in triplicate. After overnight culture at 37°C, cell supernatants were harvested by centrifugation at 350 xg for 10 min at 4°C. IFN- $\gamma$  secretion was quantified from the supernatants by sandwich ELISA as previously described.<sup>2</sup>

### **NK cell isolation and staining for ILCs**

Primary human NK cells were isolated from the peripheral blood of healthy donors acquired from the National Health Service blood service using negative magnetic bead selection (Miltenyi Biotec). Ethical approval was obtained from the Research Ethics Committee 05/Q0401/108 and 2017-2551-3945 (University of Manchester). After isolation, NK cells were plated into media (Dulbecco's Modified Eagle Medium, 30% F12 Ham, 10% human serum, 1% non-essential amino acids, 1mM sodium pyruvate (Sigma), 2mM L-glutamine, 50U/ml penicillin streptomycin, 50 $\mu$ M 2-mercaptoethanol (Gibco)) supplemented with 1ng/ml IL-15 overnight. To test for the presence of ILCs, NK cells were washed in 1% FBS/PBS and blocked with 1% human AB serum (Sigma-Aldrich) for 15 min at 4°C before staining. NK cells were stained for 20 min at 4°C with viability dye (Zombie UV; Biolegend), PE-labelled anti-CD56 mAb (RRID:AB\_395906) and BV785-labelled anti-CD127 mAb (RRID:AB\_2563605). Cells were then washed in 1% FBS/PBS and fixed in 2% PFA/PBS for 15 min. Cells were then washed in 1% FBS/PBS and permeabilised using Triton X-100 (0.01%) for 20 min at room temperature before staining for AF488-labelled anti-PRF1 mAb ( $\delta$ G9; BD Biosciences) or isotype matched control mAb (AF488-labelled IgG2b (MPC-11; Biolegend)) for 30 min. Finally cells were washed in 1% FBS/PBS and assessed by flow cytometry (BD LSR II flow cytometer).

### **Processing of scRNA-seq data**

Raw FASTQ files were processed using 10X Genomics CellRanger software (v 2.0.1) in-order to map reads against the human hg38 reference genome, filter out unexpressed genes, and count barcodes and unique molecular identifiers (UMIs). After alignment, more in-depth quality control,

normalisation and analysis were conducted using the Bioconductor package Seurat (v 2.3.0)<sup>3</sup> in R (v 3.3). Only data from high quality cells was used for further analysis.

Filtering to remove low quality cells was conducted per datasets using the following features: 1) genes expressed in less than 3 cells; 2) cells with less than 200 genes expressed and 3) cells expressing a high proportion of mitochondrial-associated genes; 4) gene count (nGene) and 5) UMI count; the thresholds of which were based on manual interpretation of the plots (Supplemental Table 1). Following filtering, normalisation was performed using the Seurat global-scaling normalisation method. Briefly, gene expression values for each cell were divided by the total number of transcripts and multiplied by 10,000. These values are then natural-log transformed using log<sub>1p</sub> for further downstream analyses. After normalization, scaling was performed to regress out cell-cell variation driven by nUMI and the percentage of mitochondrial-associated genes. To do this, scaled z-score residuals were calculated for each gene for downstream dimensionality reduction

### **Effects of cell cycle**

Using the “CellCycleScoring” command, cells were assigned a quantitative score using the expression of 94 cell cycle genes. Principal component analysis (PCA) was then run using the cell cycle genes to visualise cell separation.

### **Data Analysis of CMV-negative and CMV-positive donors**

To identify similarities between blood NK cells between individuals who tested positive or negative for CMV, data were obtained from two CMV-positive healthy donors and an additional CMV-negative healthy donor. Each dataset was processed individually using the same pipeline outlined previously. For comparison with our original analyses, 8,000 random cells (1,600 per donor) from the additional donors and our two original CMV-negative donors (unstimulated cells only) were taken forward for the combined analyses. Due to inherent variability between donors and to

avoid donor specific clusters, we used the Seurat alignment strategy to identify NK cell subsets common across the donors. Briefly, 1,723 genes (highly variable in >2 datasets) were used in the CCA. The CCA subspace was then aligned and cells were clustered using a shared nearest neighbour (SNN) modularity optimisation-based clustering algorithm and visualised using tSNE. Clustering was done using twenty components from the CCA dimensionality reduction, identified by means of the shared correlation strength and using a resolution of 0.7.

## Supplemental References

1. Eleme K, Taner SB, Önfelt B, et al. Cell Surface Organization of Stress-inducible Proteins ULBP and MICA That Stimulate Human NK Cells and T Cells via NKG2D. *J. Exp. Med.* 2004;199(7):1005–1010.
2. Oszmiana A, Williamson DJ, Cordoba SP, et al. The Size of Activating and Inhibitory Killer Ig-like Receptor Nanoclusters Is Controlled by the Transmembrane Sequence and Affects Signaling. *Cell Rep.* 2016;15(9):1957–1972.
3. Butler A, Hoffman P, Smibert P, Papalexi E, Satija R. Integrating single-cell transcriptomic data across different conditions, technologies, and species. *Nat. Biotechnol.* 2018;36(5):411–420.
4. Yu J, Mao HC, Wei M, et al. CD94 surface density identifies a functional intermediary between the CD56<sup>bright</sup> and CD56<sup>dim</sup> human NK-cell subsets. *Blood.* 2010;115(2):274–282.
5. Oki T, Nishimura K, Kitaura J, et al. A novel cell-cycle-indicator, mVenus-p27K-, identifies quiescent cells and visualizes G0-G1 transition. *Sci. Rep.* 2014;4:.
6. Hernandez-Segura A, de Jong T V., Melov S, et al. Unmasking Transcriptional Heterogeneity in Senescent Cells. *Curr. Biol.* 2017;27(17):2652–2660.e4.
7. Hanna J, Bechtel P, Zhai Y, et al. Novel Insights on Human NK Cells' Immunological Modalities Revealed by Gene Expression Profiling. *J. Immunol.* 2004;173(11):6547–6563.

## Supplemental Table Legends

**Table S1. Individual filtering thresholds.** Filtering threshold used per individual datasets during QC and the number of cells filtered out.

**Table S2. Variable genes.** Individual thresholds used to determine the number of variable genes within the individual datasets.

**Table S3. Conserved markers associated with each NK cluster.** Spreadsheets of conserved markers associated with each cluster.

## Supplemental Figure Legends

**Supplemental Figure 1. IFN- $\gamma$  assay to determine functional responses of NK cells sequenced.** IFN- $\gamma$  secretion (mean $\pm$  SD) from NK cells was quantified by enzyme-linked immunosorbent assay.

**Supplemental Figure 2. Clustering is not influenced by donor variability or cell cycle.** (A) t-distributed stochastic neighbour embedding (tSNE), two-dimensional (2D) plot colour coding the individual cells according to which donor and condition they originated from. (B) Quantification showing the percentage of cells within each cluster across the donors and conditions. (C) Quantification showing the percentage of cells within different phases of the cell cycle across the clusters (calculated individually for unstimulated and IL-2 stimulated cells).

**Supplemental Figure 3. A strong correlation is observed across all clusters.** Correlation analysis using the top 20 markers associated with each cluster (including the excluded clusters 5, 7 and 9) and using all cells (unstimulated and stimulated).

**Supplemental Figure 4. Diffusion map dimensionality reduction.** Diffusion map to show the underlying structure within the dataset by using non-linear dimensionality reduction to preserve continuous trajectories not observed with linear methods. Cells are colour coded by cluster identity (excluding clusters 5, 7 and 9).

**Supplemental Figure 5. Cluster 4 is not a population of non-NK cell ILCs.** (A) Flow cytometry plots of negatively isolated human NK cells, showing the expression of CD56 and CD127 on gated live, singlet cells and then showing the expression of intracellular perforin on the CD56<sup>+</sup>CD127<sup>+</sup> sup-population. (B) Expression distribution of each cluster (violin plots) using unstimulated cells only, looking at ILC specific markers. The shape represents the distribution of cells based on their log(+1) expression values (y axis). The colour scale represents the mean expression. (C) Dotplot (top) of the same ILC

specific markers within unstimulated cells only (columns) across the different clusters (rows). The size of the dot represents the percentage of cells expressing the markers whilst the colour encodes the average scaled expression values.

**Supplemental Figure 6. The bright-like signature of cluster 2 is primarily driven by 5 genes.** tSNE plots (excluding clusters 5, 7 and 9), showing the expression of genes driving the CD56<sup>bright</sup> association within cluster 2 (using full dataset). Expression is colour coded from blue (low) to red (high) and cells positively expressing a marker were brought towards the front of the plot.

**Supplemental Figure 7. Cluster 6 is not a population of intermediate CD56<sup>dim</sup>CD94<sup>high</sup> NK cells.** Heatmap of markers which differentiate intermediate CD56<sup>dim</sup>CD94<sup>high</sup>NKG2A<sup>+</sup> NK cells from CD56<sup>dim</sup> and CD56<sup>bright</sup> NK cells using flow cytometry<sup>4</sup>. Clusters 0, 1 and 2 were combined and termed “Grouped CD56<sup>dim</sup>”; cluster 4 was termed “CD56<sup>bright</sup>”; clusters 3 and 8 were excluded from this analysis. NK cell “groups” are plotted in columns and markers of interest are shown in rows. Gene expression is colour coded using average scaled expression values per group, based upon z-score distributions, ranging from low expression (purple) to high expression (yellow).

**Supplemental Figure 8. Cluster 8 is a novel population of NK cells.** (A) The distribution of percentage of the number genes expressed (nGene) and the number of unique molecular identifiers (nUMI). The shapes represent the distribution whilst the error bars represent median and interquartile range. (B) Module scores for each NK cell cluster at the single cell level calculated using markers of quiescence<sup>5</sup> (left) and markers of senescence<sup>6</sup> (right) The shapes represent the distribution whilst the error bars represent median and interquartile range. (C) The distribution of the percentage of mitochondrial mRNA across clusters; using unstimulated cells only (left). Module scores for each NK cell cluster at the single cell level calculated using pro-apoptotic markers (right). Module scores were calculated for unstimulated cells only. Violin plots represent the distribution



for each cluster whilst the error bars represent median and interquartile range. (D) Comparison of average gene expression values for cluster 8 between unstimulated (x-axis) and IL-2 stimulated (y-axis) cells. Genes with a fold-change > 0.5 and Bonferroni corrected p-value <0.05 are highlighted.

**Supplemental Figure 9. Overview of identified clusters from joint analysis of NK cells isolated from**

**CMV negative and CMV positive donors.** (A) Module scores for each NK cell cluster calculated at the single cell level, defined using the top 100 markers from bulk expression profiles of sorted CD56<sup>dim</sup>CD16<sup>+</sup> and CD56<sup>bright</sup>CD16<sup>-</sup> NK cells.<sup>7</sup> CD56<sup>dim</sup> module score (left) and custom CD56<sup>bright</sup> module score, *excluding CTSW, DUSP1, JUN, FOS and CD69* (right). Violin plots represent the distribution of the module scores for each cluster whilst the error bars represent median and interquartile range. (B) Heatmap of canonical CD56<sup>bright</sup> NK cell markers. Clusters are plotted in columns and genes are shown in rows. Gene expression is colour coded using average scaled expression values per cluster, based upon a z-score distribution, ranging from low expression (purple) to high expression (yellow). (C) Heatmap of top 10 markers distinguishing each NK cell cluster, identified by differential expression analysis and showing a maximum of 500 genes per cluster; excluding stressed cells and APCs. Cells are plotted in columns and genes are shown in rows. Gene expression is colour coded using a scale based on z-score distribution. (D) top markers distinguishing inflamed type 1 IFN NK cells, (E) top markers distinguishing CIML NK cells and (F) top markers distinguishing low ribosomal NK cells and IEGs. Clusters are plotted in columns and genes are shown in rows. Gene expression is colour coded using average scaled expression values per cluster, based upon a z-score distribution, ranging from low expression (purple) to high expression (yellow).

**Supplemental Table 1: Filtering thresholds determined by manual interpretation per dataset**

| Thresholds used                | DonorA unstim |       | DonorA + IL2 |       | DonorB unstim |       | DonorB + IL2 |       |
|--------------------------------|---------------|-------|--------------|-------|---------------|-------|--------------|-------|
|                                | min           | max   | min          | max   | min           | max   | min          | max   |
| mitochondrial genes expression | -             | 10%   | -            | 8%    | -             | 8%    | -            | 8%    |
| nGENE                          | 200           | -     | 200          | 3,000 | 200           | -     | 200          | -     |
| nUMI                           | -             | 8,000 | -            | 8,000 | -             | 7,500 | -            | 7,000 |
| <b>Cells filtered out</b>      | <b>42</b>     |       | <b>40</b>    |       | <b>47</b>     |       | <b>57</b>    |       |

**Supplemental Table 2: Thresholds used to determine the number of variable genes within each dataset**

| Thresholds used              | DonorA unstim |     | DonorA + IL2 |     | DonorB unstim |     | DonorB + IL2 |     |
|------------------------------|---------------|-----|--------------|-----|---------------|-----|--------------|-----|
|                              | min           | max | min          | max | min           | max | min          | max |
| Variable gene expression     | 0.025         | 5   | 0.025        | 4   | 0.025         | 5   | 0.025        | 6   |
| <b>Number variable genes</b> | <b>2,582</b>  |     | <b>2,563</b> |     | <b>2,328</b>  |     | <b>2,118</b> |     |

Figure S1.

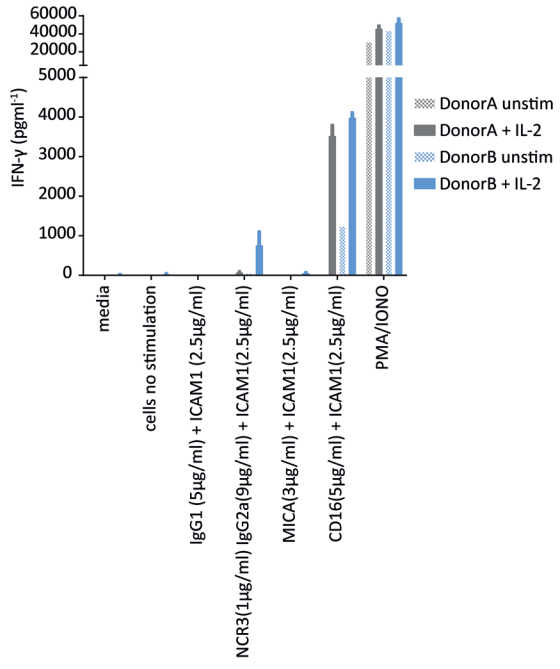

Figure S2.

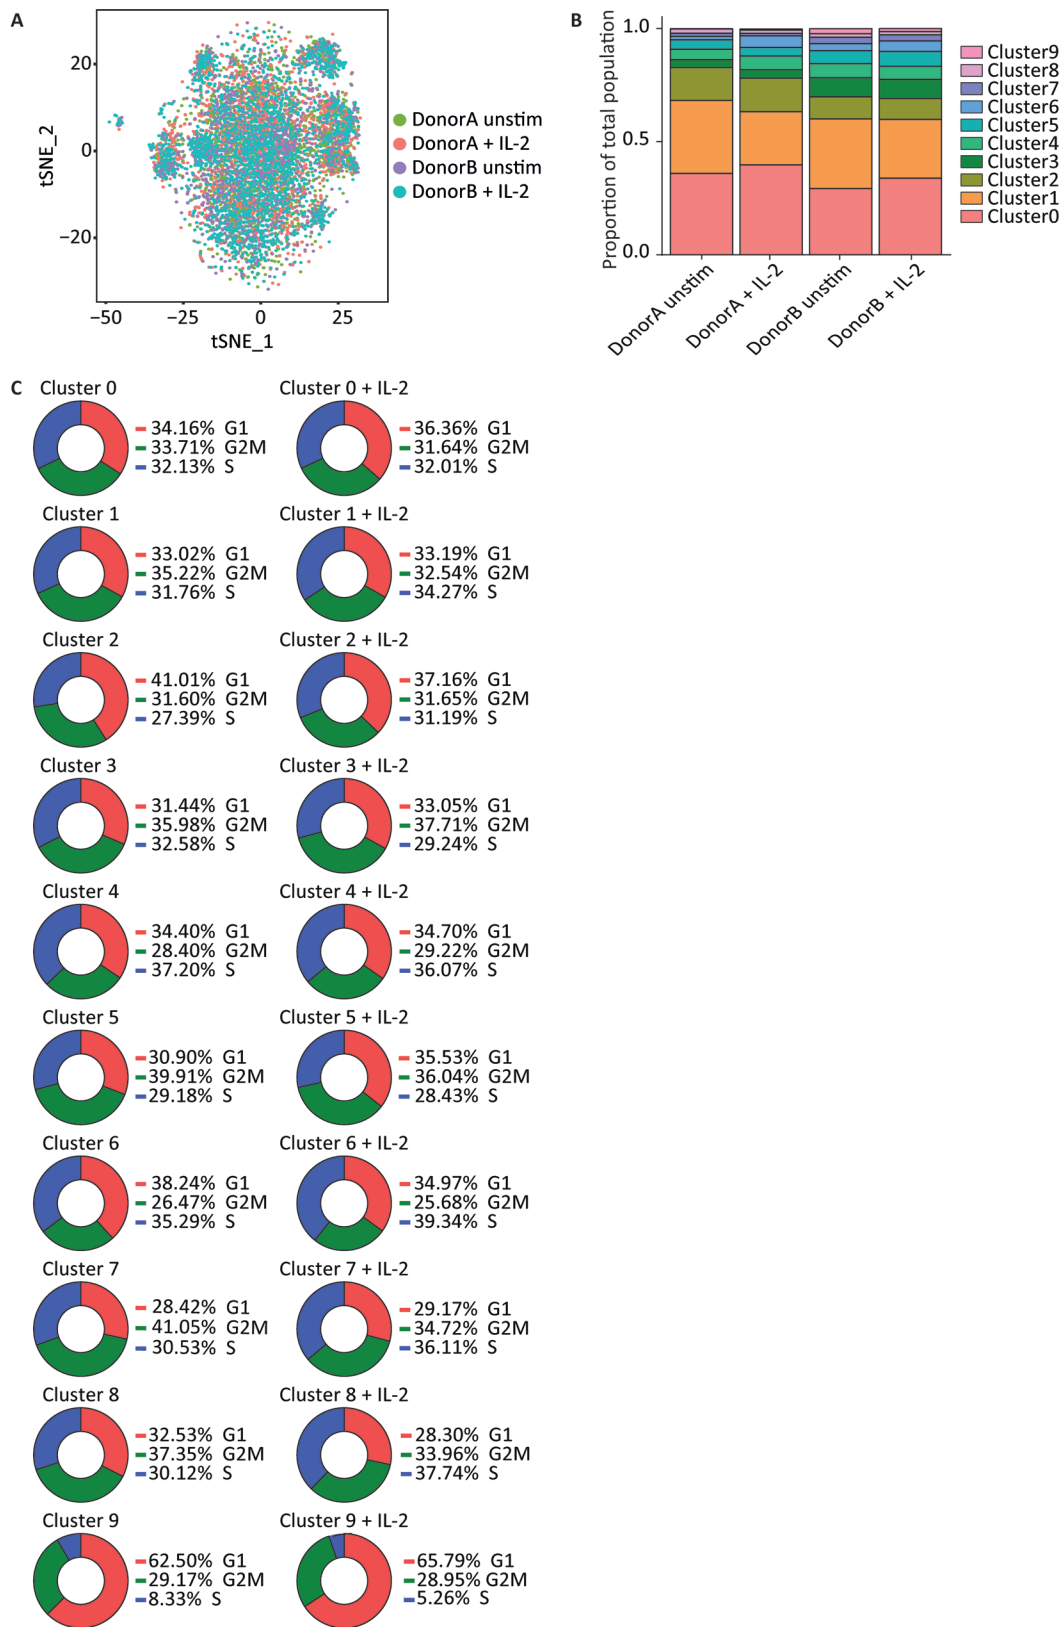

Figure S3.

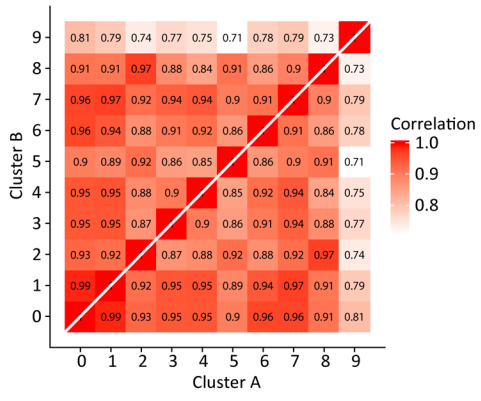

Figure S4.

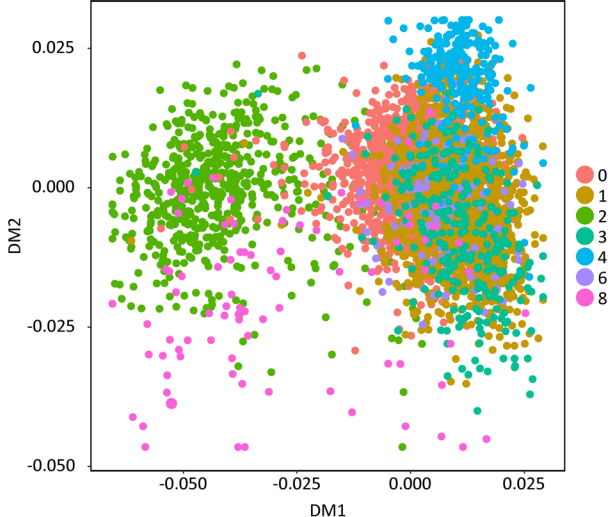

Figure S5.

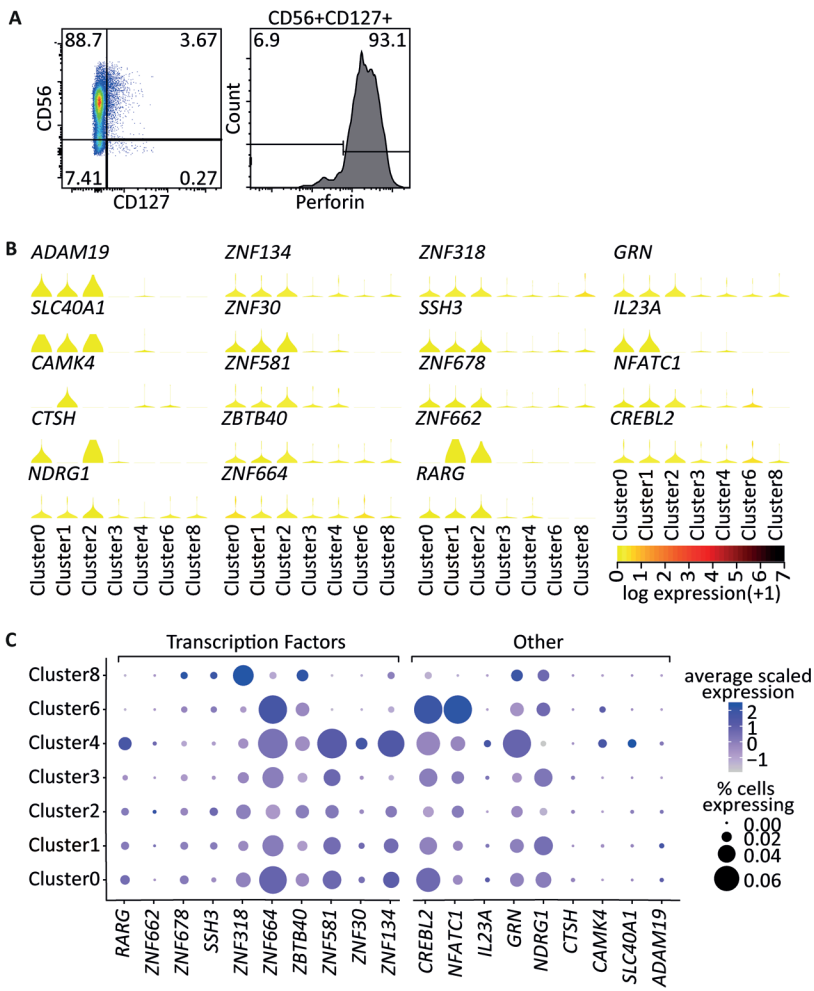

Figure S6.

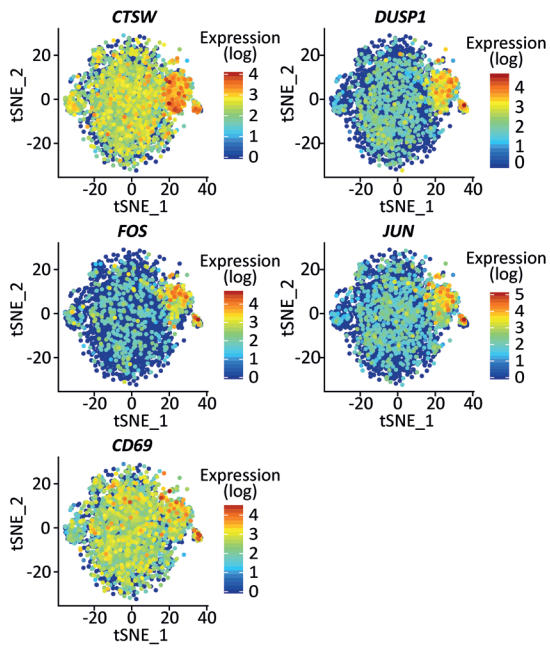



Figure S7.

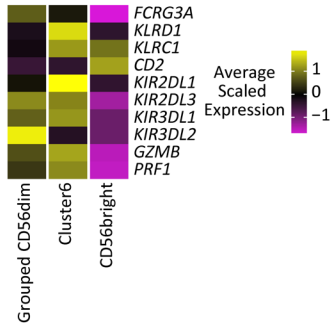

Figure S8.

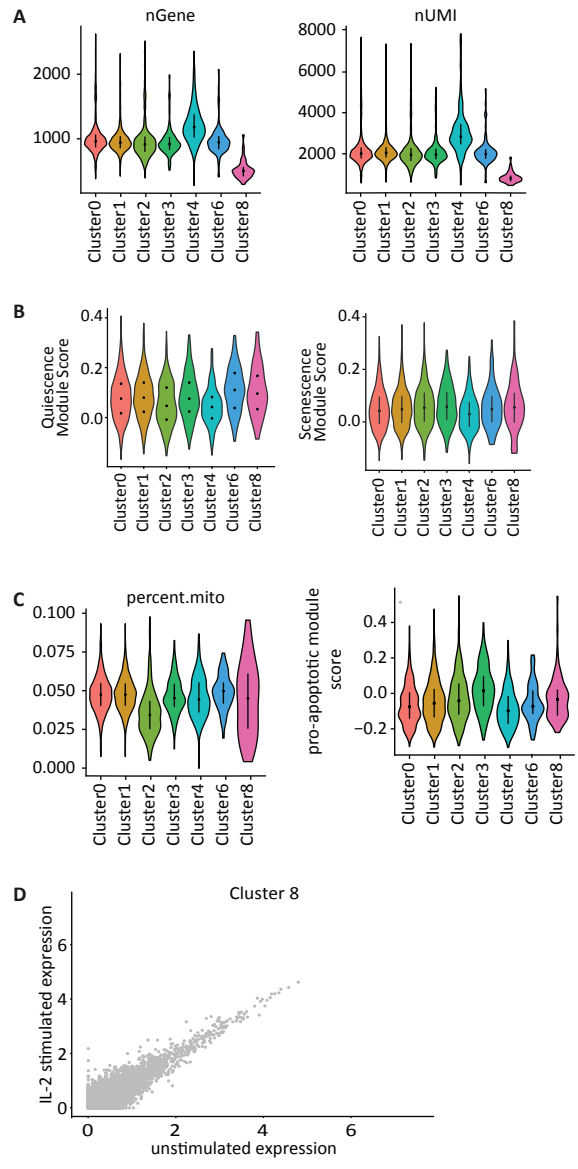

Figure S9.

A

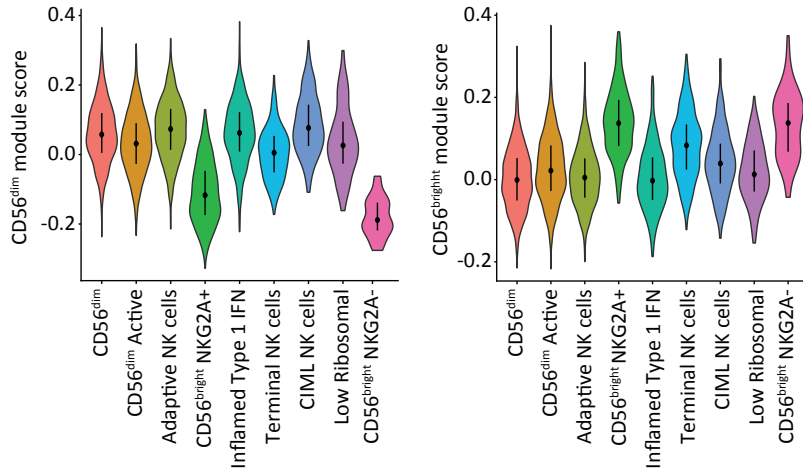

B

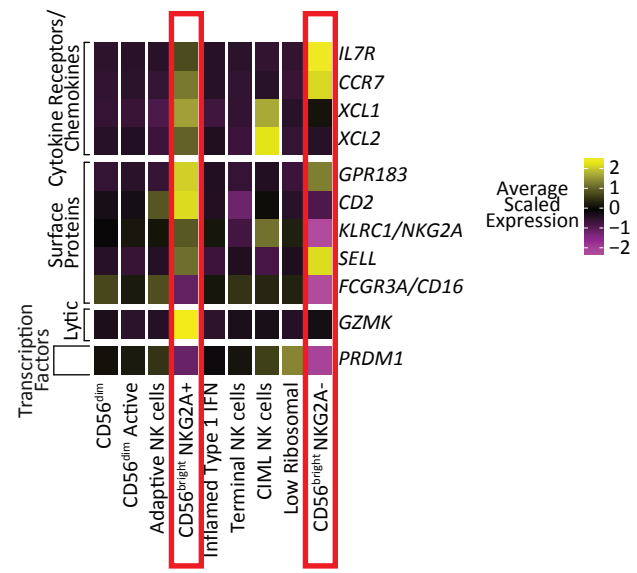

C

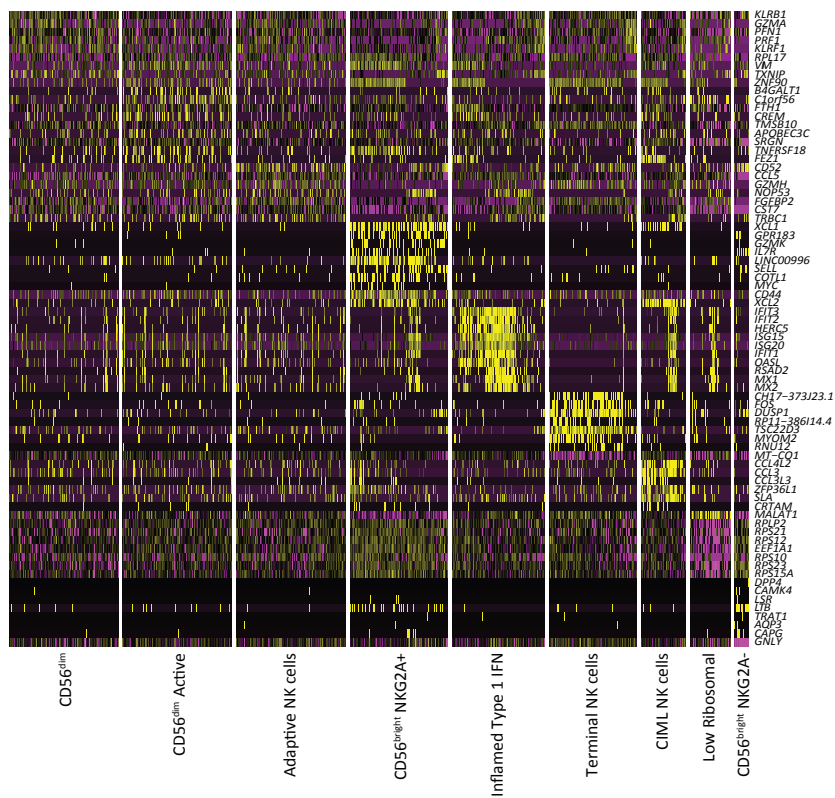

D

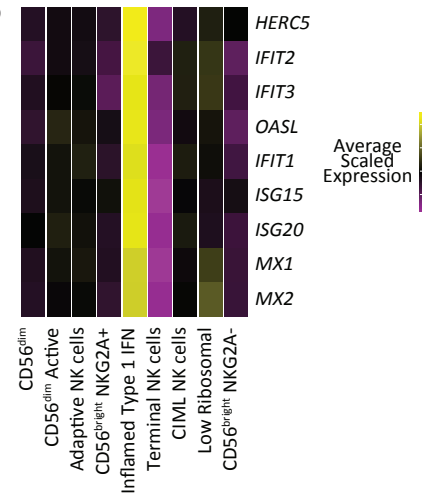

E

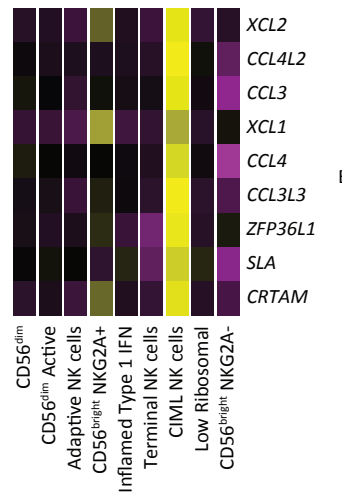

F

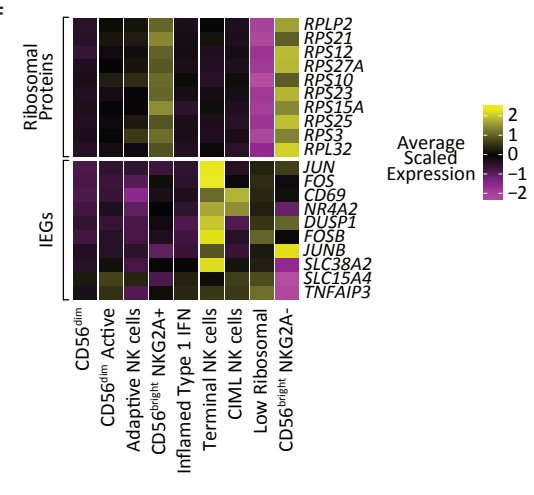

Supplement: advancesADV2019000699-suppl1.pdf [file advancesADV2019000699-suppl1.pdf]
